# Supplementary material for: Prevalence of Spotted Fever Group Rickettsia and Candidatus Lariskella in Multiple Tick Species from Guizhou Province, China
Source: MDPI journal article supplement (doi:10.3390/biom12111701), 2022-11-17
Supplement: s1 [file s1]

Table S2. Genbank numbers of the *rrs*, *gltA*, *groEL*, and *ompA* sequences of *Rickettsia* and *Candidatus* Lariskella guizhouensis in this study.

| No. | Gene         | Genbank Number | Bacterial Strain                                   |
|-----|--------------|----------------|----------------------------------------------------|
| 1   | <i>rrs</i>   | OP115561       | <i>Candidatus</i> _Lariskella_guizhouensis_QDN-15  |
| 2   | <i>rrs</i>   | OP115562       | <i>Candidatus</i> _Lariskella_guizhouensis_QDN-20  |
| 3   | <i>rrs</i>   | OP115563       | <i>Candidatus</i> _Lariskella_guizhouensis_QDN-22  |
| 4   | <i>rrs</i>   | OP115564       | <i>Candidatus</i> _Lariskella_guizhouensis_QDN-26  |
| 5   | <i>gltA</i>  | OP125507       | <i>Candidatus</i> _Lariskella_guizhouensis_QDN-15  |
| 6   | <i>gltA</i>  | OP125508       | <i>Candidatus</i> _Lariskella_guizhouensis_QDN-20  |
| 7   | <i>gltA</i>  | OP125509       | <i>Candidatus</i> _Lariskella_guizhouensis_QDN-22  |
| 8   | <i>gltA</i>  | OP125510       | <i>Candidatus</i> _Lariskella_guizhouensis_QDN-26  |
| 9   | <i>groEL</i> | OP125511       | <i>Candidatus</i> _Lariskella_guizhouensis_QDN-15  |
| 10  | <i>groEL</i> | OP125512       | <i>Candidatus</i> _Lariskella_guizhouensis_QDN-20  |
| 11  | <i>groEL</i> | OP125513       | <i>Candidatus</i> _Lariskella_guizhouensis_QDN-22  |
| 12  | <i>groEL</i> | OP125514       | <i>Candidatus</i> _Lariskella_guizhouensis_QDN-26  |
| 13  | <i>rrs</i>   | OP107869       | <i>Candidatus</i> _Rickettsia_jingxinensis_QDN- 5  |
| 14  | <i>rrs</i>   | OP107870       | <i>Candidatus</i> _Rickettsia_jingxinensis_QDN- 83 |
| 15  | <i>rrs</i>   | OP107871       | <i>Rickettsia_monacensis</i> _QDN-1                |
| 16  | <i>rrs</i>   | OP107872       | <i>Rickettsia_monacensis</i> _QDN-3                |
| 17  | <i>rrs</i>   | OP107873       | <i>Rickettsia_monacensis</i> _QDN-C4               |
| 18  | <i>rrs</i>   | OP107874       | <i>Rickettsia_monacensis</i> _QDN-C7               |

|    |              |          |                                                   |
|----|--------------|----------|---------------------------------------------------|
| 19 | <i>rrs</i>   | OP107875 | <i>Rickettsia_monacensis</i> _QDN-C14             |
| 20 | <i>gltA</i>  | OP125487 | <i>Candidatus_Rickettsia_jingxinensis</i> _QDN-5  |
| 21 | <i>gltA</i>  | OP125488 | <i>Rickettsia_monacensis</i> _QDN-1               |
| 22 | <i>gltA</i>  | OP125489 | <i>Rickettsia_monacensis</i> _QDN-3               |
| 23 | <i>gltA</i>  | OP125490 | <i>Rickettsia_monacensis</i> _QDN-C4              |
| 24 | <i>gltA</i>  | OP125491 | <i>Rickettsia_monacensis</i> _QDN-C7              |
| 25 | <i>gltA</i>  | OP125492 | <i>Rickettsia_monacensis</i> _QDN-C14             |
| 26 | <i>groEL</i> | OP125493 | <i>Candidatus_Rickettsia_jingxinensis</i> _QDN-5  |
| 27 | <i>groEL</i> | OP125494 | <i>Candidatus_Rickettsia_jingxinensis</i> _QDN-83 |
| 28 | <i>groEL</i> | OP125495 | <i>Rickettsia_monacensis</i> _QDN-1               |
| 29 | <i>groEL</i> | OP125496 | <i>Rickettsia_monacensis</i> _QDN-3               |
| 30 | <i>groEL</i> | OP125497 | <i>Rickettsia_monacensis</i> _QDN-C4              |
| 31 | <i>groEL</i> | OP125498 | <i>Rickettsia_monacensis</i> _QDN-C7              |
| 32 | <i>groEL</i> | OP125499 | <i>Rickettsia_monacensis</i> _QDN-C14             |
| 33 | <i>ompA</i>  | OP125500 | <i>Candidatus_Rickettsia_jingxinensis</i> _QDN-5  |
| 34 | <i>ompA</i>  | OP125501 | <i>Candidatus_Rickettsia_jingxinensis</i> _QDN-83 |
| 35 | <i>ompA</i>  | OP125502 | <i>Rickettsia_monacensis</i> _QDN-1               |
| 36 | <i>ompA</i>  | OP125503 | <i>Rickettsia_monacensis</i> _QDN-3               |
| 37 | <i>ompA</i>  | OP125504 | <i>Rickettsia_monacensis</i> _QDN-C4              |
| 38 | <i>ompA</i>  | OP125505 | <i>Rickettsia_monacensis</i> _QDN-C7              |
| 39 | <i>ompA</i>  | OP125506 | <i>Rickettsia_monacensis</i> _QDN-C14             |

---
