# Supplementary material for: Prevalence of Spotted Fever Group Rickettsia and Candidatus Lariskella in Multiple Tick Species from Guizhou Province, China
Source: MDPI journal article supplement (doi:10.3390/biom12111701), 2022-11-17
Supplement: s1 [file s1]

Table S1. The primers used for amplification of *gltA* and *groEL* genes from *Candidatus* Lariskella guizhouensis by hemi-nested PCR.

| Primer     | Gene         | Cycle | Sequence                      | Anticipated<br>Amplicon<br>Length |
|------------|--------------|-------|-------------------------------|-----------------------------------|
| LariEL-ex5 | <i>groEL</i> | 1     | 5-CCWMAADTYACWAARGATGGWGT-3   | 450 bp                            |
| LariEL-ex3 | <i>groEL</i> | 1     | 5-TTKNARYTTYTCYTTATCRTADTC-3  |                                   |
| LariEL-in3 | <i>groEL</i> | 2     | 5-TTTCKTCTRTCDCCRANCC-3       |                                   |
| LariGltex5 | <i>gltA</i>  | 1     | 5-CATGCTGATCAYGARCAAAATGC-3   | 650 bp                            |
| LariGlt3   | <i>gltA</i>  | 1     | 5-TCTTCHGGAGCYAAYCCDTTGTG-3   |                                   |
| LariGltin5 | <i>gltA</i>  | 2     | 5-TCWTCVATCATTTCTTTCCATTGAG-3 |                                   |
